# Supplementary material for: Fermented egg-milk beverage alleviates dextran sulfate sodium-induced colitis in mice through the modulation of intestinal flora and short-chain fatty acids
Source: Royal Society of Chemistry journal article supplement (doi:10.1039/d1fo03040j), 2021-12-03
Supplement: d1fo03040j1.pdf [file d1fo03040j1.pdf]

**Table.S1 Proteins in fermented egg milk beverage (FEMB)**

| Accession  | Protein    | Coverage (%) | Peptides number | PSMs | MW (kDa) | Score sequent HT |
|------------|------------|--------------|-----------------|------|----------|------------------|
| A0A2H4Y810 | OVA        | 63           | 24              | 1826 | 42.900   | 3024.130         |
| A0A2H4Y816 | OVA        | 62           | 23              | 1748 | 42.900   | 2967.220         |
| A0A2H4Y879 | OVA        | 62           | 23              | 1744 | 42.900   | 2964.790         |
| A0A2H4Y7Z9 | OVA        | 61           | 24              | 1635 | 42.800   | 2939.020         |
| A0A2H4Y7Z2 | OVA        | 55           | 20              | 1719 | 42.900   | 2862.850         |
| A0A2H4Y8G6 | OVA        | 55           | 19              | 1750 | 42.800   | 2822.960         |
| A0A2H4Y7U4 | OVA        | 55           | 22              | 1529 | 42.700   | 2722.820         |
| A0A2H4Y8B2 | OVA        | 59           | 23              | 1562 | 42.800   | 2722.130         |
| A0A2H4Y7R6 | OVA        | 53           | 19              | 1533 | 42.800   | 2625.840         |
| A0A2H4Y8I1 | OVA        | 60           | 22              | 1524 | 42.800   | 2545.760         |
| A0A2H4Y821 | OVA        | 60           | 22              | 1531 | 42.900   | 2431.510         |
| A0A2H4Y7X8 | OVA        | 54           | 19              | 1418 | 42.800   | 2295.110         |
| A0A2H4Y842 | OVA        | 58           | 20              | 1391 | 43.000   | 2287.900         |
| A0A2H4Y8E8 | OVA        | 43           | 17              | 1330 | 42.800   | 2065.710         |
| A0A2H4Y8B1 | OVA        | 48           | 16              | 1133 | 42.800   | 1988.620         |
| A0A2H4Y814 | OVA        | 42           | 10              | 890  | 42.800   | 1296.620         |
| P02789     | OTF        | 58           | 51              | 851  | 77.700   | 488.100          |
| B8YK75     | Lysozyme C | 80           | 14              | 166  | 16.200   | 147.660          |

Notes: PSMs: Peptide spectrum matches, the number of recognized peptide sequences of the protein. MW, molecular weight, the sum of the relative atomic masses of all the atoms that make up the molecule. OVA and OTF are short for Ovalbumin and Ovotransferrin.

**Table.S2 Organ parameter and colon length of mice in different groups**

|         | Liver index     | Kidney index   | Spleen index   | Colon length (cm) |
|---------|-----------------|----------------|----------------|-------------------|
| CK      | 0.044 ± 0.003c  | 0.015 ± 0.001a | 0.003 ± 0.001a | 7.310 ± 0.680a    |
| CK+FDB  | 0.047 ± 0.004bc | 0.016 ± 0.001a | 0.003 ± 0.001a | 7.390 ± 0.600a    |
| DSS+FDW | 0.052 ± 0.003a  | 0.016 ± 0.002a | 0.004 ± 0.001a | 5.160 ± 0.340d    |
| DSS+GB  | 0.044 ± 0.004c  | 0.016 ± 0.001a | 0.004 ± 0.001a | 5.700 ± 0.170c    |
| DSS+FDB | 0.048 ± 0.003b  | 0.015 ± 0.001a | 0.004 ± 0.001a | 6.200 ± 0.530b    |

Notes: Data represents as means ± SD (n=12). DSS (Dextran sulfate sodium), CK (Control check), CK+FDB (Control check and freely drinking beverage), DSS+FDW (DSS and freely drinking water), DSS+GB (DSS and gavage beverage), DSS+FDB (DSS and freely drinking beverage). Different letters in each row indicate significant difference ( $p < 0.05$ ) between different groups.

**Table.S3 Alpha community diversity of cecum content in different groups**

|         | shannon        | simpson        | ace               | chao              | coverage |
|---------|----------------|----------------|-------------------|-------------------|----------|
| CK      | 3.126 ± 0.075b | 0.114 ± 0.024a | 299.842 ± 25.898b | 299.404 ± 25.270b | 0.999    |
| CK+FDB  | 4.102 ± 2.390a | 0.140 ± 0.016a | 394.260 ± 11.036a | 394.576 ± 15.253a | 0.999    |
| DSS+FDW | 2.865 ± 0.461b | 0.150 ± 0.075a | 261.059 ± 28.281c | 260.300 ± 28.483b | 0.999    |
| DSS+GB  | 3.087 ± 0.626b | 0.152 ± 0.141a | 376.177 ± 44.098a | 379.270 ± 62.753a | 0.998    |
| DSS+FDB | 3.221 ± 0.787b | 0.152 ± 0.173a | 364.854 ± 21.330a | 376.877 ± 34.243a | 0.998    |

Notes: Data represents as means ± SD (n=12). DSS (Dextran sulfate sodium), CK (Control check), CK+FDB (Control check and freely drinking beverage), DSS+FDW (DSS and freely drinking water), DSS+GB (DSS and gavage beverage), DSS+FDB (DSS and freely drinking beverage). Different letters in each row indicate significant difference ( $p < 0.05$ ) between different groups.

**Table.S4 Short chain fatty acids (SCFAs) content in mice cecum of different groups ( $\mu\text{g/mL}$ )**

| <b>SCFAs</b>     | <b>CK</b>              | <b>CK+FDB</b>          | <b>DSS+FDW</b>         | <b>DSS+GB</b>          | <b>DSS+FDB</b>        |
|------------------|------------------------|------------------------|------------------------|------------------------|-----------------------|
| Acetic acid      | 113.901 $\pm$ 16.734ab | 90.791 $\pm$ 30.685b   | 120.935 $\pm$ 14.602ab | 120.172 $\pm$ 20.941ab | 130.764 $\pm$ 20.033a |
| Propanoic acid   | 69.402 $\pm$ 13.047b   | 75.706 $\pm$ 25.317b   | 68.325 $\pm$ 9.204b    | 88.582 $\pm$ 25.017ab  | 105.281 $\pm$ 22.206a |
| Isobutyric acid  | 12.031 $\pm$ 4.992a    | 10.262 $\pm$ 3.273a    | 9.192 $\pm$ 1.447a     | 7.493 $\pm$ 1.364a     | 11.464 $\pm$ 1.867a   |
| Butanoic acid    | 166.267 $\pm$ 27.906a  | 110.627 $\pm$ 47.394bc | 145.049 $\pm$ 24.756ab | 56.412 $\pm$ 10.766d   | 87.735 $\pm$ 33.111cd |
| Isovaleric acid  | 10.502 $\pm$ 5.551a    | 9.667 $\pm$ 3.261a     | 7.051 $\pm$ 1.097a     | 5.357 $\pm$ 0.955a     | 9.576 $\pm$ 2.734a    |
| Valeric acid     | 25.682 $\pm$ 4.239a    | 12.292 $\pm$ 4.495ab   | 24.465 $\pm$ 3.303a    | 7.857 $\pm$ 2.256b     | 7.197 $\pm$ 3.762b    |
| Isohexanoic acid | 0.225 $\pm$ 0.032a     | 0.163 $\pm$ 0.738ab    | 0.192 $\pm$ 0.063ab    | 0.127 $\pm$ 0.046b     | 0.170 $\pm$ 0.060ab   |
| Hexanoic acid    | 0.685 $\pm$ 0.109a     | 0.518 $\pm$ 0.113b     | 0.647 $\pm$ 0.133a     | 0.432 $\pm$ 0.014b     | 0.484 $\pm$ 0.549b    |

Notes: Data represents as means  $\pm$  SD (n=12). DSS (Dextran sulfate sodium), CK (Control check), CK+FDB (Control check and freely drinking beverage), DSS+FDW (DSS and freely drinking water), DSS+GB (DSS and gavage beverage), DSS+FDB (DSS and freely drinking beverage). Different letters in each row indicate significant difference ( $p < 0.05$ ) between different groups.
